# Supplementary material for: Multilayered double perovskite ferroelectric for green high-performance self-powered X-ray detection
Source: Royal Society of Chemistry journal article supplement (doi:10.1039/d4qi03059a), 2025-01-01
Supplement: d4qi03059a1.pdf [file d4qi03059a1.pdf]

## **Multilayered double perovskite Ferroelectric for Green High-Performance Self-Powered X-ray Detection**

Zhangtong Han,<sup>[a], [b]</sup> Qianwen Guan,<sup>[a], [b]</sup> Huang Ye,<sup>\*[a]</sup> Yi Liu,<sup>[a], [b]</sup> Jianbo Wu,<sup>[a]</sup> Lijun Xu,<sup>[a], [b]</sup> Chengshu Zhang,<sup>[a]</sup> Hang Li,<sup>[a], [b]</sup> Qiuxiao Yin<sup>[a]</sup> and Junhua Luo<sup>\*[a], [b]</sup>

<sup>a</sup> State Key Laboratory of Structure Chemistry, Fujian Institute of Research on the Structure of Matter, Chinese Academy of Sciences, Fuzhou, Fujian, 350002, P. R. China. Email: yehuang@fjirsm.ac.cn; jhluo@fjirsm.ac.cn

<sup>b</sup> University of Chinese Academy of Sciences, Beijing, 100049, China.

### Experimental Procedures

**Materials:** Cyclohexylmethanamine (97%, Adamas), Silver oxide ( $\text{Ag}_2\text{O}$ , 99.7%, Adamas), Bismuth carbonate ( $\text{Bi}_2\text{CO}_3$ , 99.9%, Aladdin), cesium carbonate (99.5%, Aladdin), hydrobromic acid ( $\text{HBr}$ , 40%, Aladdin) were commercially purchased and used without further purification.

**Synthesis and crystal growth:** Compound  $\text{CHMA}_2\text{CsAgBiBr}_7$  (**CCAB**) was prepared by mixing a stoichiometric ratio of cyclohexylmethanamine, caesium carbonate,  $\text{Ag}_2\text{O}$  and  $\text{Bi}_2\text{O}_3$  the solution of concentrated hydrobromic acid. The saturated solution was heated and stirred at 373 K for 20 min to obtain the clarified solution. Single crystals of  $\text{CHMA}_2\text{CsAgBiBr}_7$  were grown from saturated solution at 1 K/day by temperature cooling method.

**Single crystal and powder X-ray diffraction:** The PXRD patterns of powder were obtained by the MiniFlex 600, Rigaku at room temperature using a  $\text{Cu K}\alpha$  rotating anode with an angular range of  $5^\circ - 40^\circ$  in  $0.02^\circ$  steps. The XRD pattern and rocking curves for **1** bulk crystal were collected on a Rigaku SmartLab X-ray diffractometer.

**The optical and photoelectric measurements:** The diffuse reflection spectra of **CCAB** were performed on a PerkinElmer Lambda 950 UV-vis-NIR spectrometer. The current-voltage curve measurement was measured on a high-precision electrometer (Keithley 6517B).

**Morphology Characterization:** The surface morphology of the single crystals was acquired by scanning electron microscopy (SEM) and atomic force microscope (AFM) on a JEOL JSM6700-F field emission scanning electron microscope and Bruker Dimension ICON atomic force microscope, respectively.

**Ferroelectric measurements:** The P-E hysteresis loops were carried out on a ferroelectric analyzer (Radiant Precision Premier II) by the classical Sawyer-Tower circuit method. Two pairs of electrodes were formed orthogonally on a single crystal of **CABB** with silver paste. In order to avoid electric discharge at high electric field, single crystal of **1** was immersed in silicone oil to measure the P-E hysteresis loops.

**X-ray detection:** The current-voltage ( $I-V$ ) traces and current-time ( $I-t$ ) curves were recorded by using a Keithley 6517B high-precision electrometer under X-ray irradiation. A silver target (maximum power 4 W) X-ray tube with a maximum photon energy is 50 keV and a peak intensity is at 22 keV was used as the X-ray source (Mini-X2, Amptek, USA). The dose rate of the X-ray tube can be adjusted by changing its tube current measured by an X-ray dosimeter (Accu-Gold, Radcal, USA) attached to the  $10\times 6-180$  ion chamber in an integrating mode.

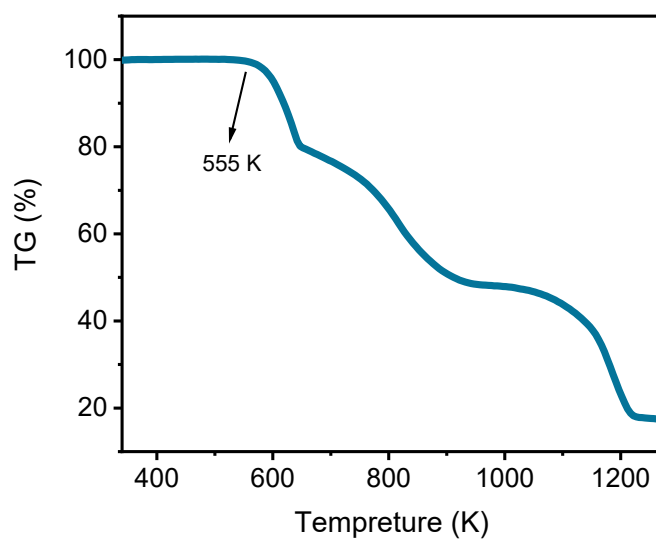

**Figure S1.** Thermal analysis of CCAB.

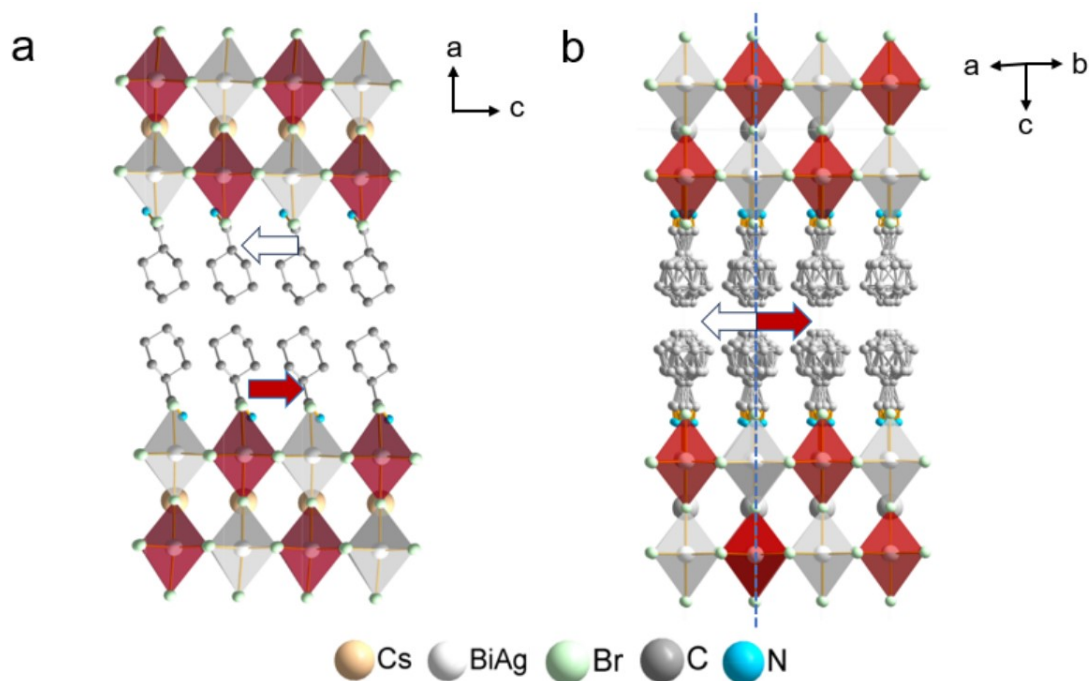

**Figure S2.** Crystal structures of CCAB. Diagram of crystal structure packings in the a AFEP at 360 K and b paraelectric HTP at 390 K. The white color shows the atomic co-occupancy of Ag and Bi.

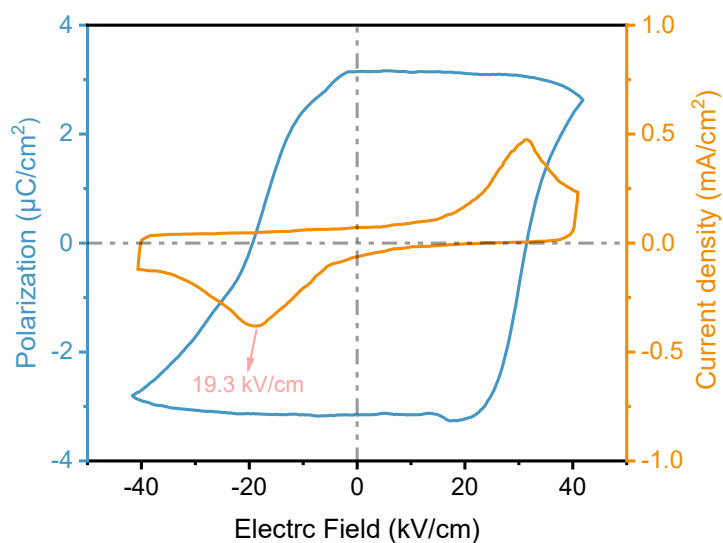

**Figure S3.** Ferroelectric hysteresis loop of **CCAB** along the *c* axes.

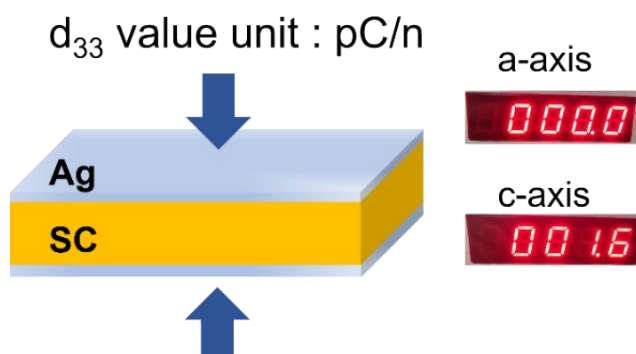

**Figure S4.** The piezoelectric schematic diagram and related  $d_{33}$  value along the *a* and *c* axes, respectively.

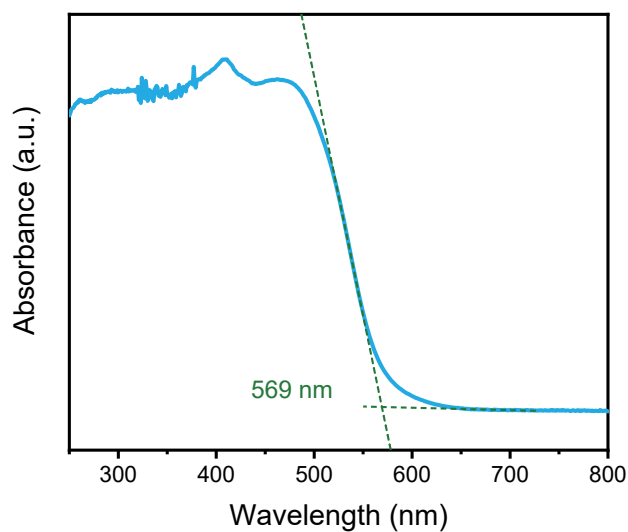

**Figure S5.** Absorption spectra of **CCAB**

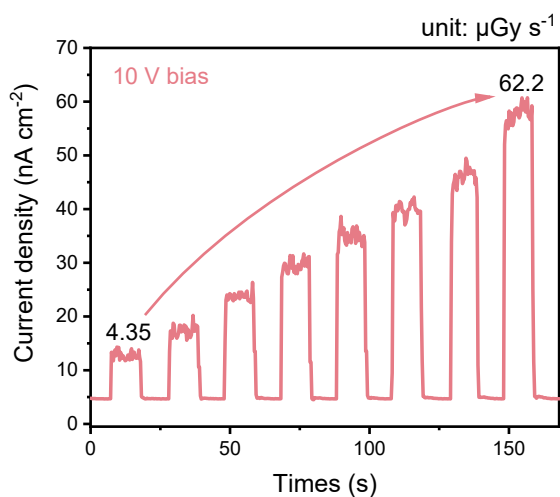

**Figure S6.** Current density-time curves of **CCAB** SC detector under 10 V bias.

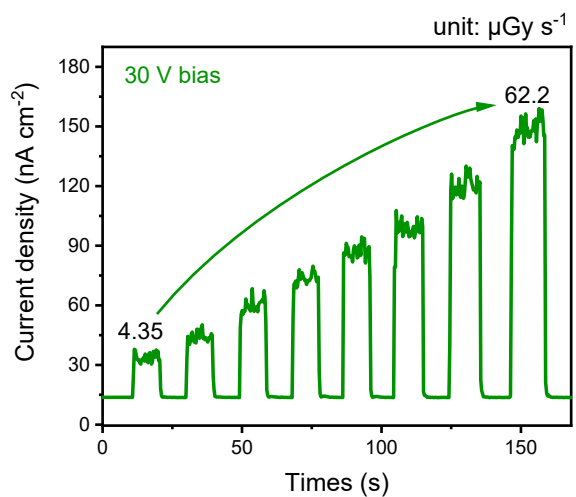

## SUPPORTING INFORMATION

**Figure S7.** Current density-time curves of **CCAB** SC detector under 30 V bias.

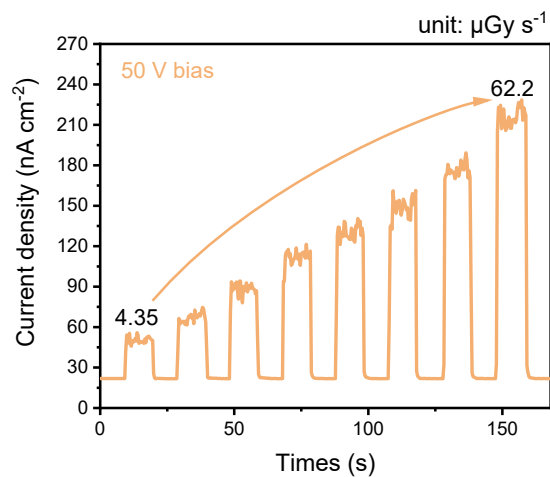

**Figure S8.** Current density-time curves of **CCAB** SC detector under 50 V bias.

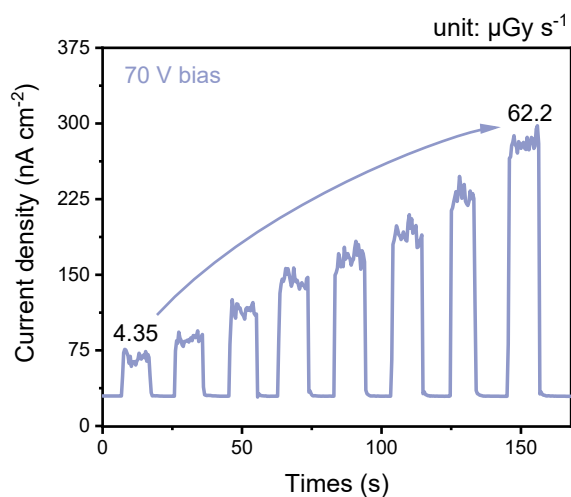

**Figure S9.** Current density-time curves of **CCAB** SC detector 770 V bias.

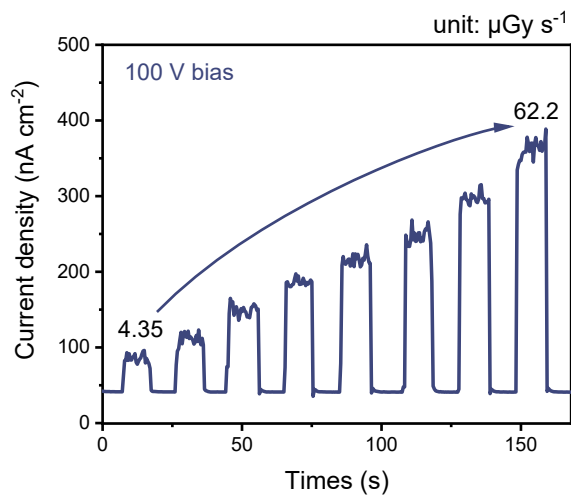

## SUPPORTING INFORMATION

**Figure S10.** Current density-time curves of **CCAB** SC detector 100 V bias.

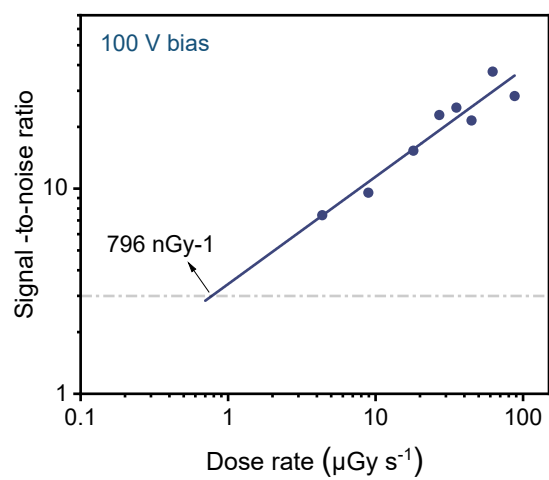

**Figure S11.** The detection limit of **CCAB** under 100 V biases
